# Supplementary material for: Dietary delphinidin inhibits human colorectal cancer metastasis associating with upregulation of miR-204-3p and suppression of the integrin/FAK axis
Source: PubMed Central journal article supplement (PMC6908670; doi:10.1038/s41598-019-55505-z), 2019-12-12

Supplementary information for

**Dietary delphinidin inhibits human colorectal cancer metastasis associating with upregulation of miR-204-3p and suppression of the integrin/FAK axis**

Chi-Chou Huang<sup>1,2#</sup>, Chia-Hung Hung<sup>3#</sup>, Tung-Wei Hung<sup>4,5</sup>, Yi-Chieh Lin<sup>3</sup>, Chau-Jong Wang<sup>3,6\*</sup>, Shao-Hsuan Kao<sup>3,6\*</sup>,

<sup>1</sup>Department of Colorectal Surgery, Chung Shan Medical University Hospital, Taichung, Taiwan.

<sup>2</sup>School of Medicine, Chung Shan Medical University, Taichung, Taiwan.

<sup>3</sup>Institute of Biochemistry, Microbiology, and Immunology, College of Medicine, Chung Shan Medical University, Taichung, Taiwan.

<sup>4</sup>Institute of Medicine, Chung Shan Medical University, Taichung, Taiwan.

<sup>5</sup>Division of Nephrology, Department of Internal Medicine, Chung Shan Medical University Hospital, Taichung, Taiwan.

<sup>6</sup>Clinical Laboratory, Chung Shan Medical University Hospital, Taichung 402, Taiwan

# Chi-Chou Huang and Chia-Hung Hung contributed equally to this work.

# Supplementary data

## Figure 4

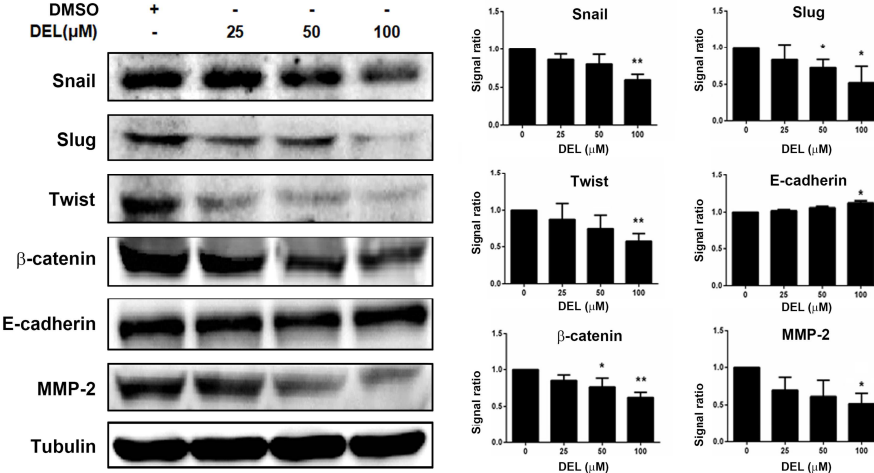

### Snail

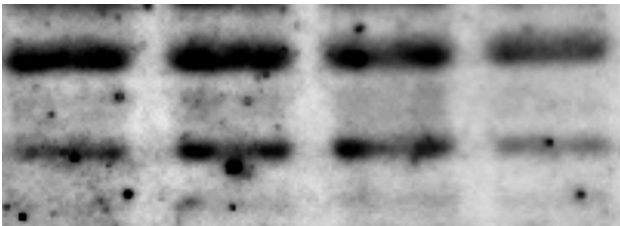

### Slug

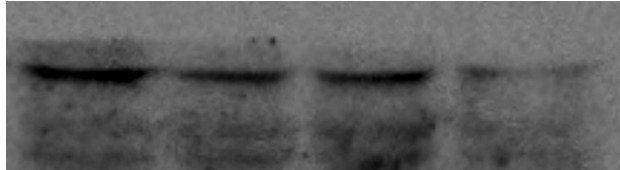

### Twist

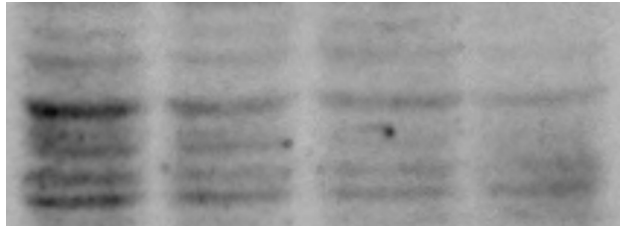

$\beta$ -catenin

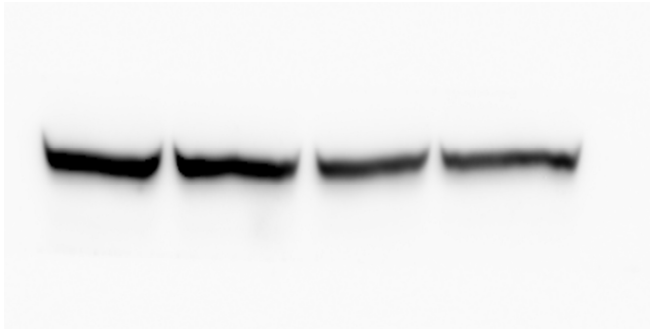

E-cadherin

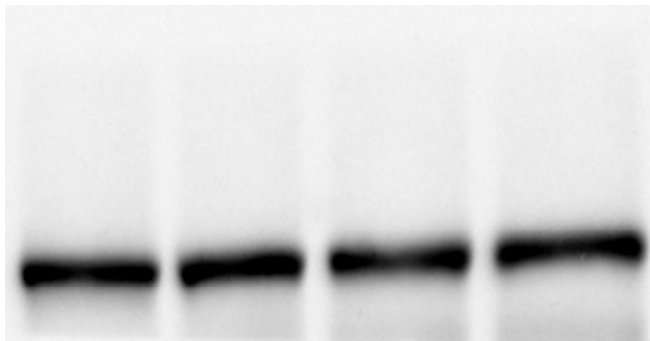

MMP-2

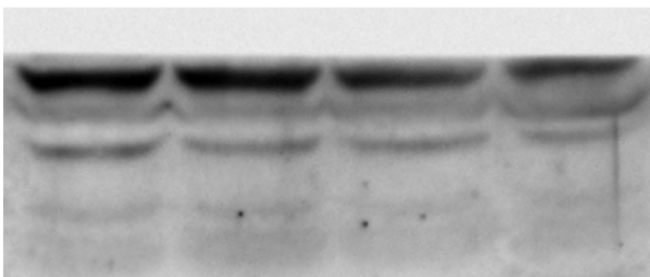

← edge of  
cutted membrane

Tubulin

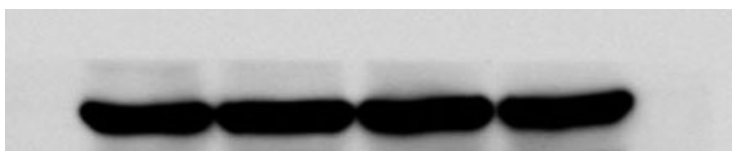

Figure 5

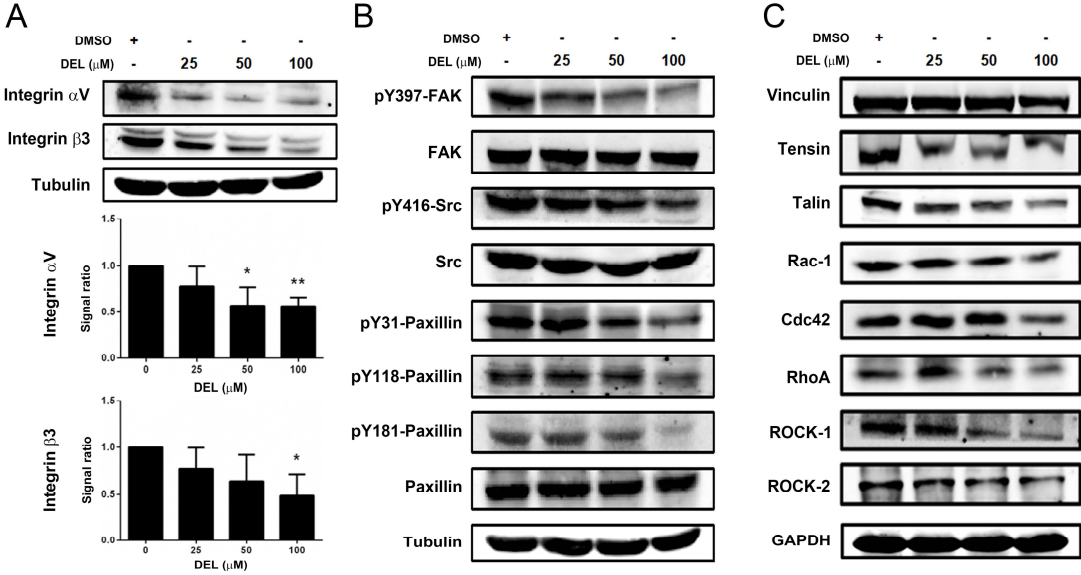

Figure 5A  
Integrin αV

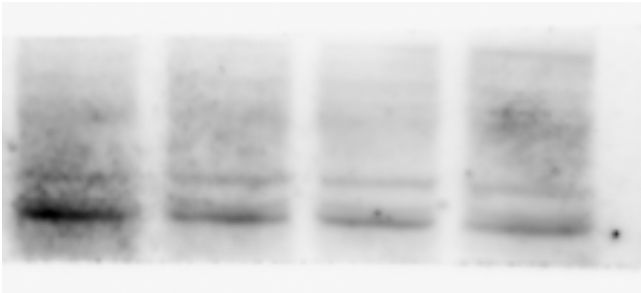

Integrin β3

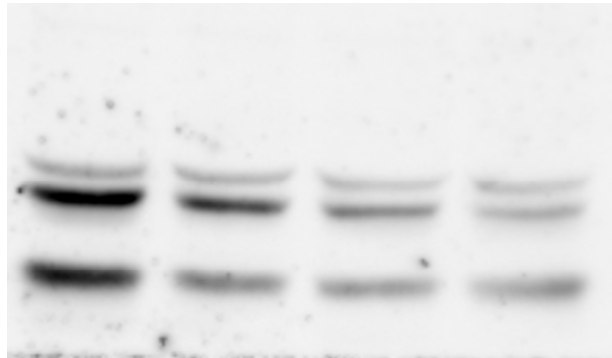

Tubulin

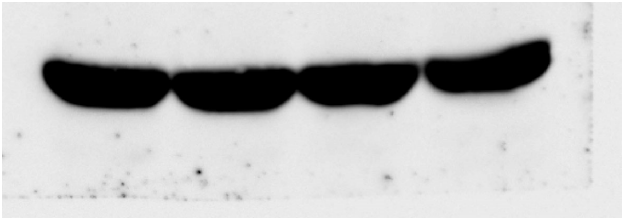

Figure 5B

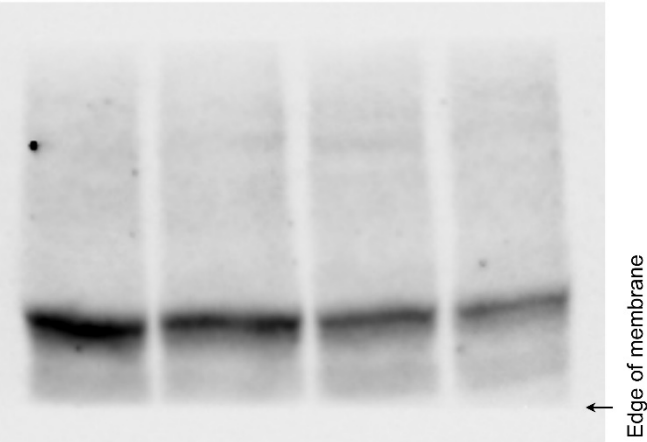

FAK (total)

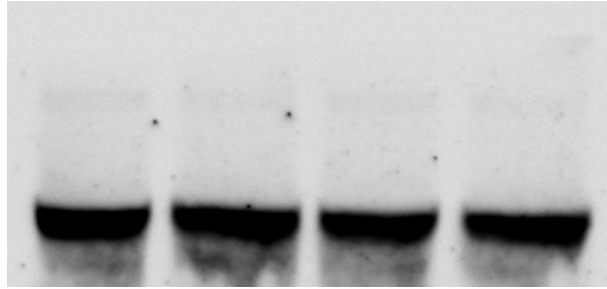

pY416-Src

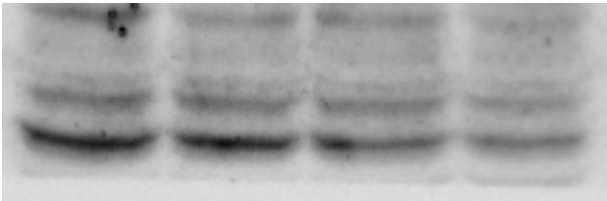

Src (total)

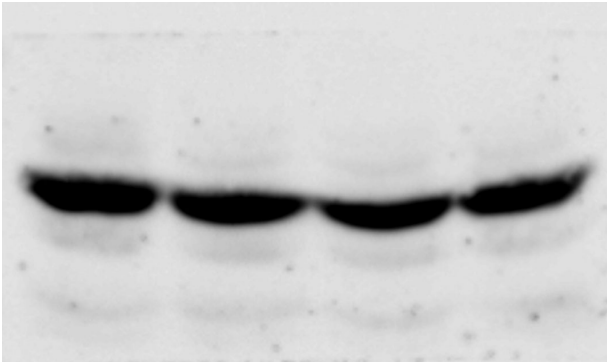

pY31-Paxillin

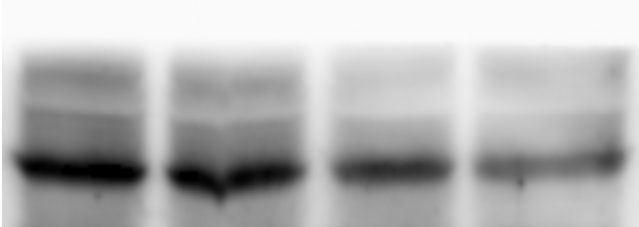

pY118-Paxillin

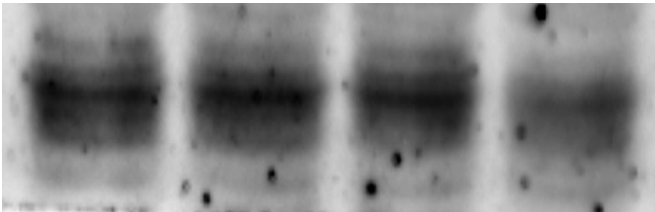

pY181-Paxillin

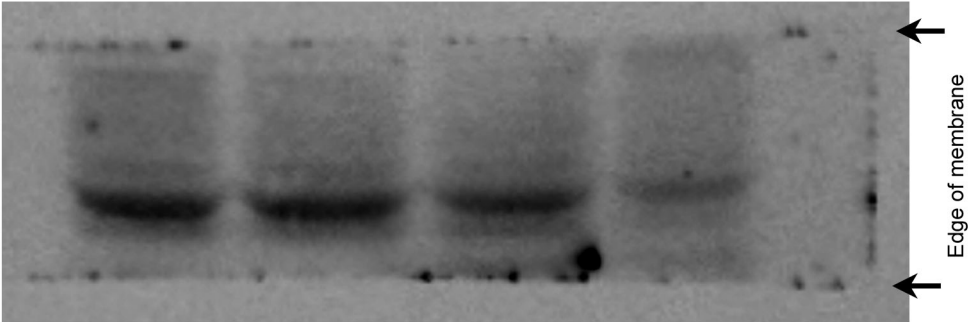

Paxillin (total)

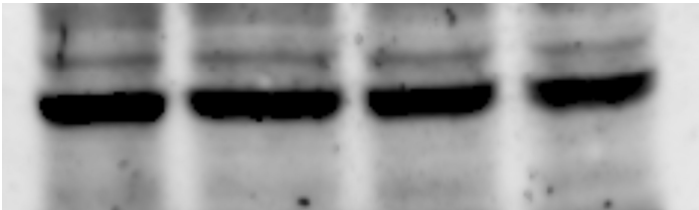

Tubulin

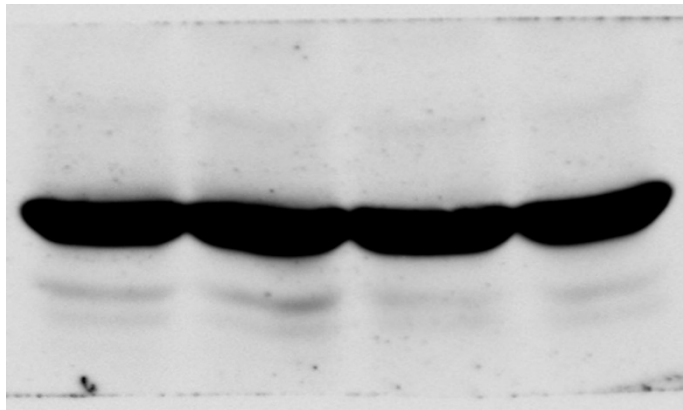

Figure 5C

Vinculin

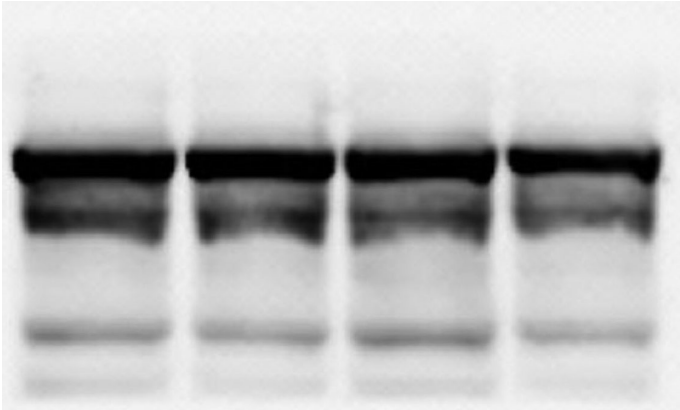

Tensin

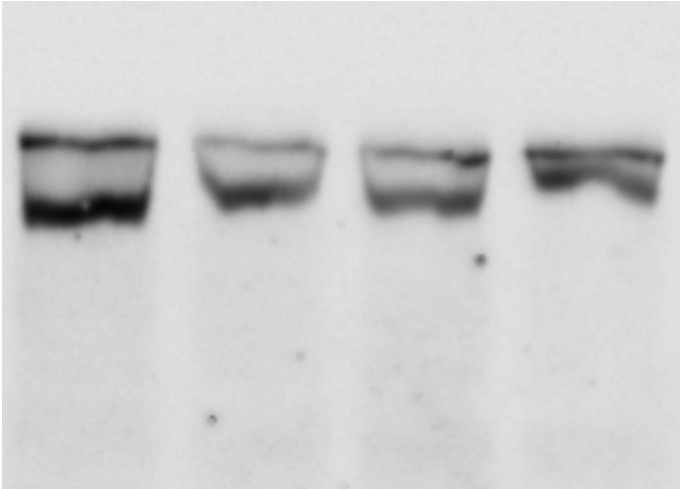

Talin

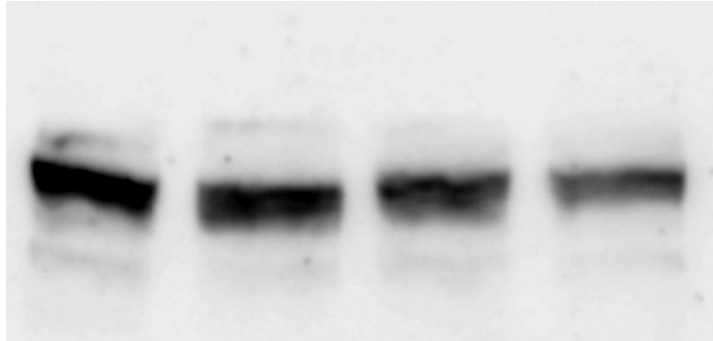

Rac1

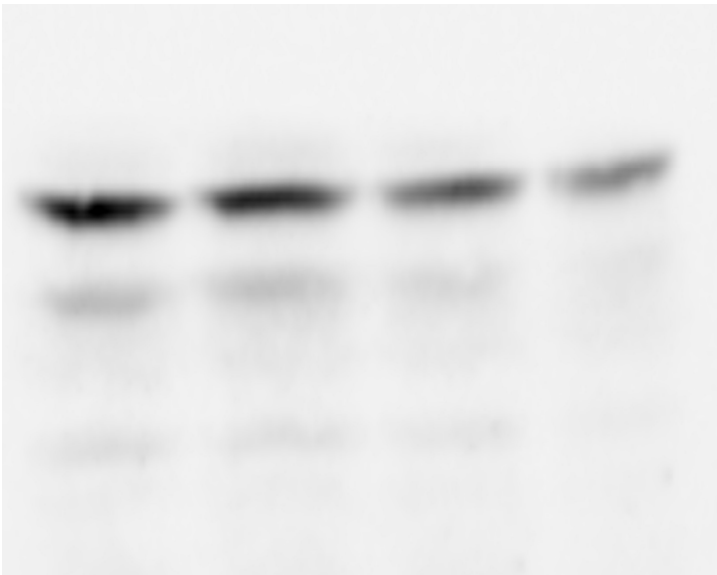



Cdc42

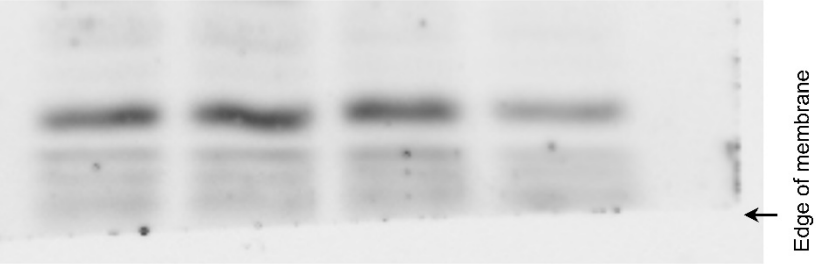

RhoA

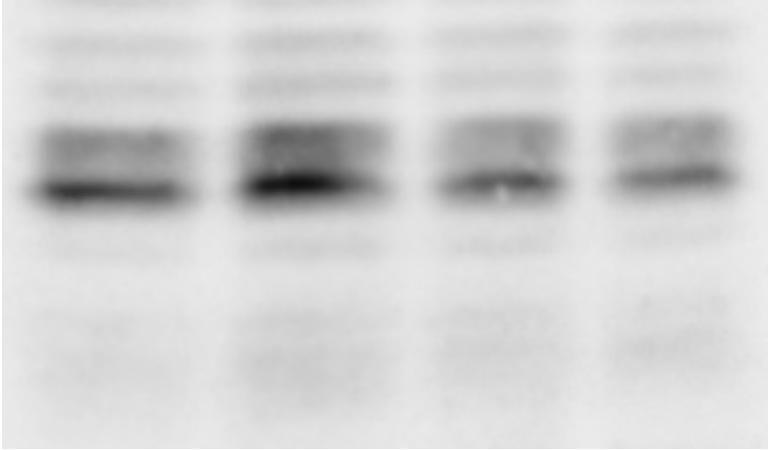

ROCK-1

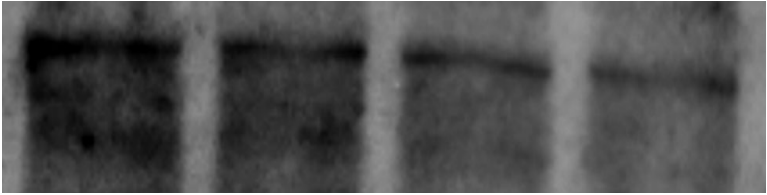

ROCK-2

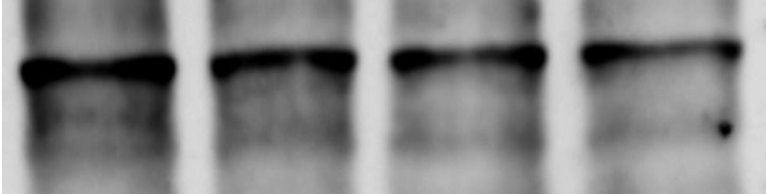

GAPDH

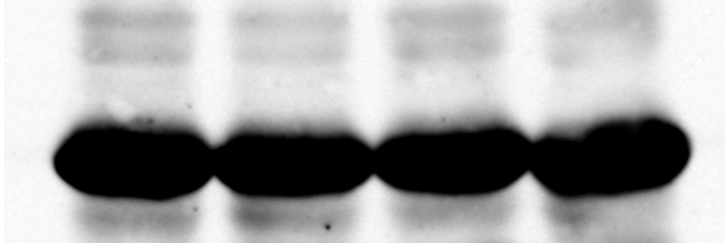

Figure 6

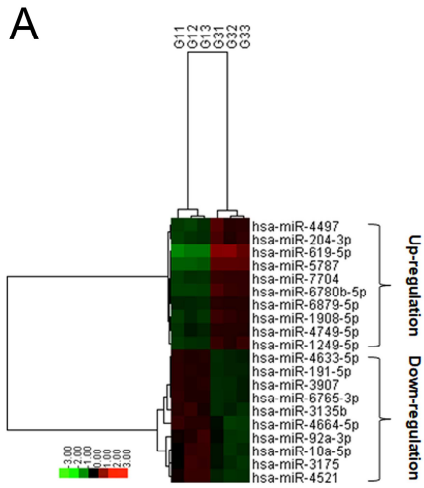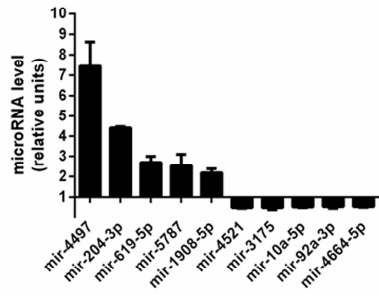

**B**

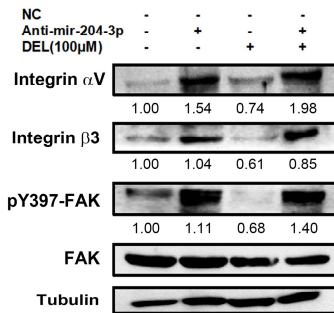

**C**

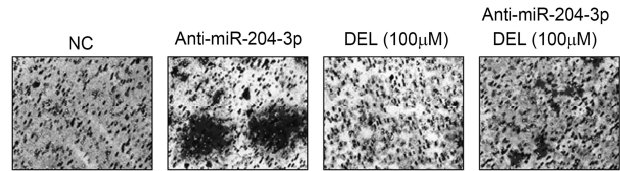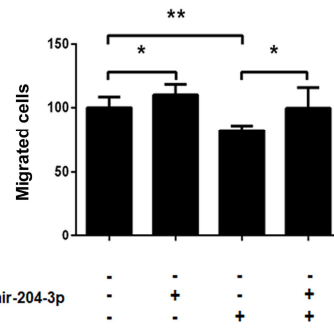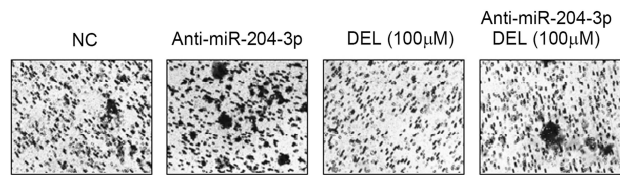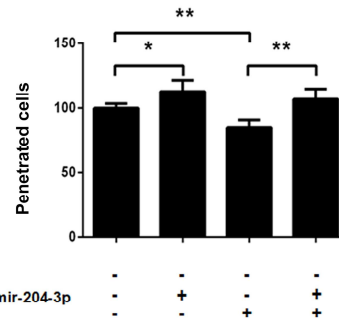

Figure 6B

Integrin  $\alpha$ V

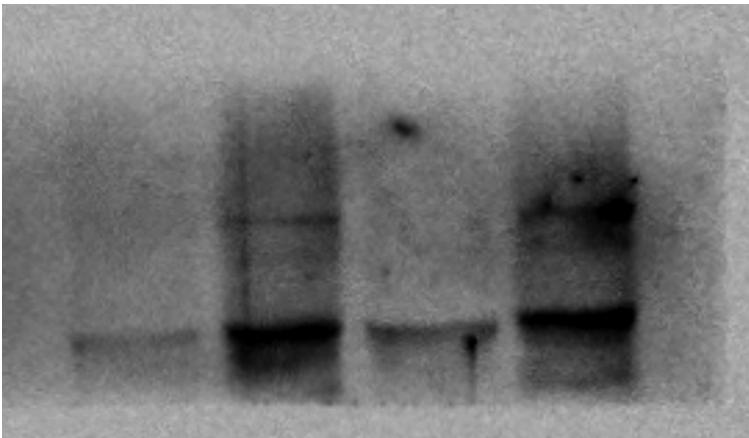

Integrin  $\beta$ 3

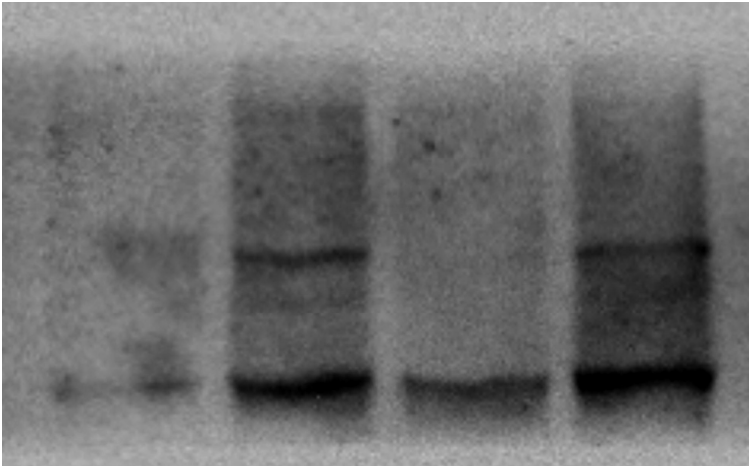

pY397-FAK

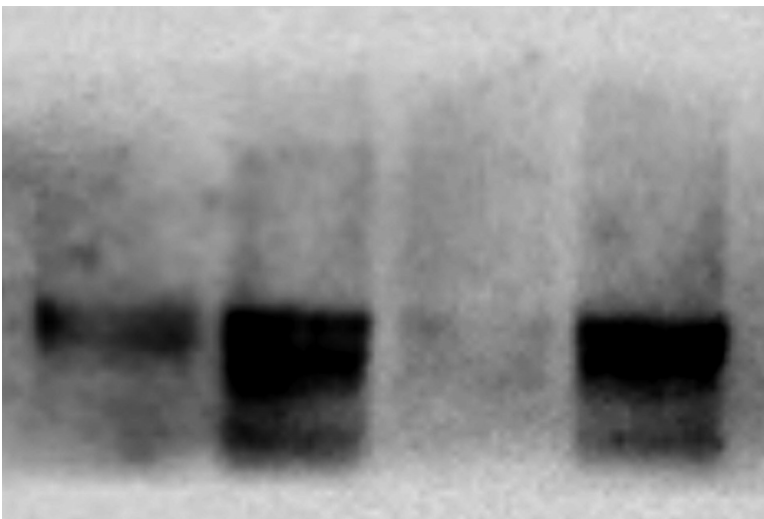

FAK (total)

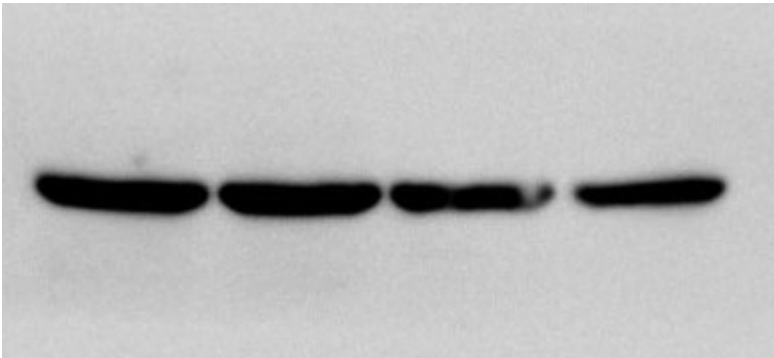

Tubulin

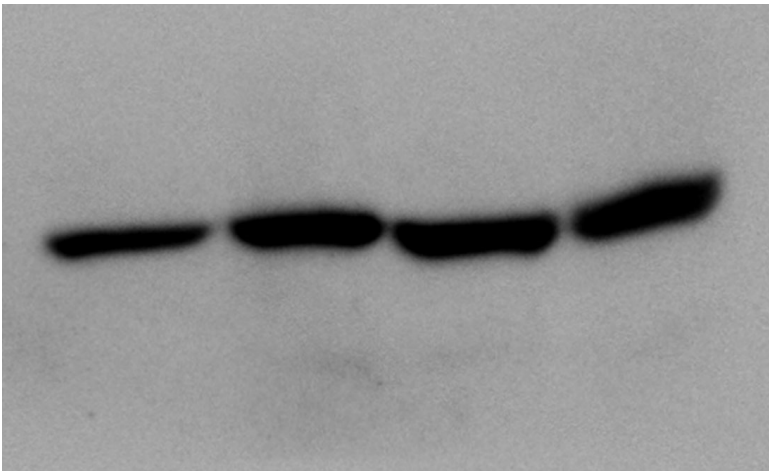

Supplement: 41598_2019_55505_MOESM1_ESM.pdf [file 41598_2019_55505_MOESM1_ESM.pdf]
